# Supplementary material for: Identification of allosteric disulfides from labile bonds in X-ray structures
Source: PubMed Central journal article supplement (PMC5830721; doi:10.1098/rsos.171058), 2018-02-07
Supplement: rsos171058supp1.pdf [file rsos171058supp1.pdf]

## Supplementary Information

### Identification of allosteric disulphides from labile bonds in X-ray structures

Aster E Pijning, Joyce Chiu, Reichelle X Yeo, Jason W H Wong, Philip J Hogg

**Table S1.** Excel spreadsheet of unique disulphides in a culled set of X-ray structures described by G. Wang and R. Dunbrack, Jr. (file pdbaanr).

**Table S2.** Excel spreadsheet of labile disulphide bonds present in some molecules of a protein crystal but absent in others (same PDB, sheet 1), or present in some structures of a protein but absent in others (different PDB, sheet 2).

**Table S3.** Allosteric disulphides with known configurations.

| Protein                              | Species                                    | Disulphide Cys | PDB ID | Configuration | Reference                                                                                                                                                                     |
|--------------------------------------|--------------------------------------------|----------------|--------|---------------|-------------------------------------------------------------------------------------------------------------------------------------------------------------------------------|
| Methionine aminopeptidase 2          | <i>Homo sapiens</i>                        | 228-448        | 1B59   | –RHstaple     | (Chiu et al., 2014)                                                                                                                                                           |
| Tissue Factor                        | <i>Homo sapiens</i>                        | 186-209        | 1BOY   | –RHstaple     | (Chen et al., 2006)                                                                                                                                                           |
| Botulinum neurotoxins                | <i>Clostridium botulinum</i>               | 436-445        | 1EPW   | –RHstaple     | (Swaminathan and Eswaramoorthy, 2000)                                                                                                                                         |
| Prolyl cis-trans isomerase, AtFKBP13 | <i>Arabidopsis thaliana</i>                | 106-111        | 1Y00   | –RHstaple     | (Gopalan et al., 2004)                                                                                                                                                        |
| HIV gp120                            | <i>Human immunodeficiency virus type 1</i> | 126-196        | 1YYM   | –RHstaple     | (Auwerx et al., 2009; Azimi et al., 2010; Barbouche et al., 2003; Gallina et al., 2002; Matthias et al., 2002; Ou and Silver, 2006; Pinkas et al., 2007; Reiser et al., 2012) |
|                                      |                                            | 296-331        |        | –RHstaple     |                                                                                                                                                                               |
|                                      |                                            | 385-418        |        | –RHstaple     |                                                                                                                                                                               |
| Transglutaminase 2                   | <i>Homo sapiens</i>                        | 370-371        | 2Q3Z   | –RHstaple     | (Malojčić and Glockshuber, 2010)                                                                                                                                              |
| CD4                                  | <i>Homo sapiens</i>                        | 130-159        | 3CD4   | –RHstaple     | (Wang et al., 2011)                                                                                                                                                           |
| Arylsulfate sulfotransferase         | <i>Escherichia coli</i>                    | 418-424        | 3ELQ   | –RHstaple     | (Zhou et al., 2014)                                                                                                                                                           |
| C-reactive protein                   | <i>Homo sapiens</i>                        | 36-97          | 3L2Y   | –RHstaple     | (Ioannou et al., 2010)                                                                                                                                                        |
| von Willebrand factor                | <i>Homo sapiens</i>                        | 2451-2468      | 3BK3   | –RHstaple     | (Giannakopoulos et al., 2012)                                                                                                                                                 |
| β <sub>2</sub> -glycoprotein I       | <i>Homo sapiens</i>                        | 288-326        | 1C1Z   | –/+RHhook     | (Zhou et al., 2010)                                                                                                                                                           |
| Factor XI                            | <i>Homo sapiens</i>                        | 362-482        | 2F83   | –/+RHhook     | (Nishii et al., 2015)                                                                                                                                                         |
| Angiotensinogen                      | <i>Homo sapiens</i>                        | 18-138         | 2WXW   | –/+RHhook     | (Butera et al., 2013)                                                                                                                                                         |

|                                           |                                   |         |      |              |                               |
|-------------------------------------------|-----------------------------------|---------|------|--------------|-------------------------------|
| Lon protease <sup>1</sup>                 | <i>Homo sapiens</i>               | 617-691 | 3WU4 | -/+RHhook    | (Metcalf et al., 2012)        |
| Plasmin(ogen)                             | <i>Homo sapiens</i>               | 462-541 | 4DUR | -/+RHhook    | (Kellett-Clarke et al., 2015) |
| Interleukin receptor subunit gamma        | <i>Homo sapiens</i>               | 160-209 | 2ERJ | -LHhook      | (Chiu et al., 2013)           |
| CD44                                      | <i>Mus musculus</i>               | 81-101  | 2JCP | -LHhook      | (Cuneo and London, 2010)      |
| Vascular endothelial growth factors C & D | <i>Homo sapiens</i>               | 156-165 | 2X1W | -LHhook      | (Butera et al., 2013)         |
| XRCC1                                     | <i>Homo sapiens</i>               | 12-20   | 3LQC | -LHhook      | (Mohammad et al., 2017)       |
| Plasmin(ogen)                             | <i>Homo sapiens</i>               | 512-536 | 4DUR | -LHhook      | (Sagong and Kim, 2017)        |
| QueF                                      | <i>Bacillus subtilis</i>          | 55-99   | 5UDG | -LHhook      | (Liu and Cowburn, 2016)       |
| CgDapF                                    | <i>Corynebacterium glutamicum</i> | 83-221  | 5H2G | -LHhook      | (Pinkas et al., 2007)         |
| C-terminal Src kinase <sup>2</sup>        | <i>Homo sapiens</i>               | 122-164 | 3EAC | +LHhook      | (Cook et al., 2013)           |
| Transglutaminase 2                        | <i>Homo sapiens</i>               | 230-370 | 3LY6 | +RHstaple    | (Kim et al., 2015)            |
| hTryptase $\beta^3$                       | <i>Homo sapiens</i>               | 191-220 | 2FPZ | -RHhook      | (Kaiser et al., 2007)         |
| Thiolase                                  | <i>Clostridium acetobutylicum</i> | 88-378  | 4XL2 | +/-LHspiral  | (Wilczynska et al., 2003)     |
| MICA                                      | <i>Homo sapiens</i>               | 202-259 | 1HYR | -/+LHhook    | (Chiu et al., 2014)           |
| PAI-2                                     | <i>Homo sapiens</i>               | 79-161  | 1BY7 | Undetermined | (Chen et al., 2006)           |

1. Also exists in a +/-LHspiral configuration (PDB ID 3WU4, chain A)

2. Also exists in a +/-RHspiral configuration (PDB ID 3EAC, chain A)

3. Also exists in a -RHspiral configuration (PDB ID 2FPZ, chain B)

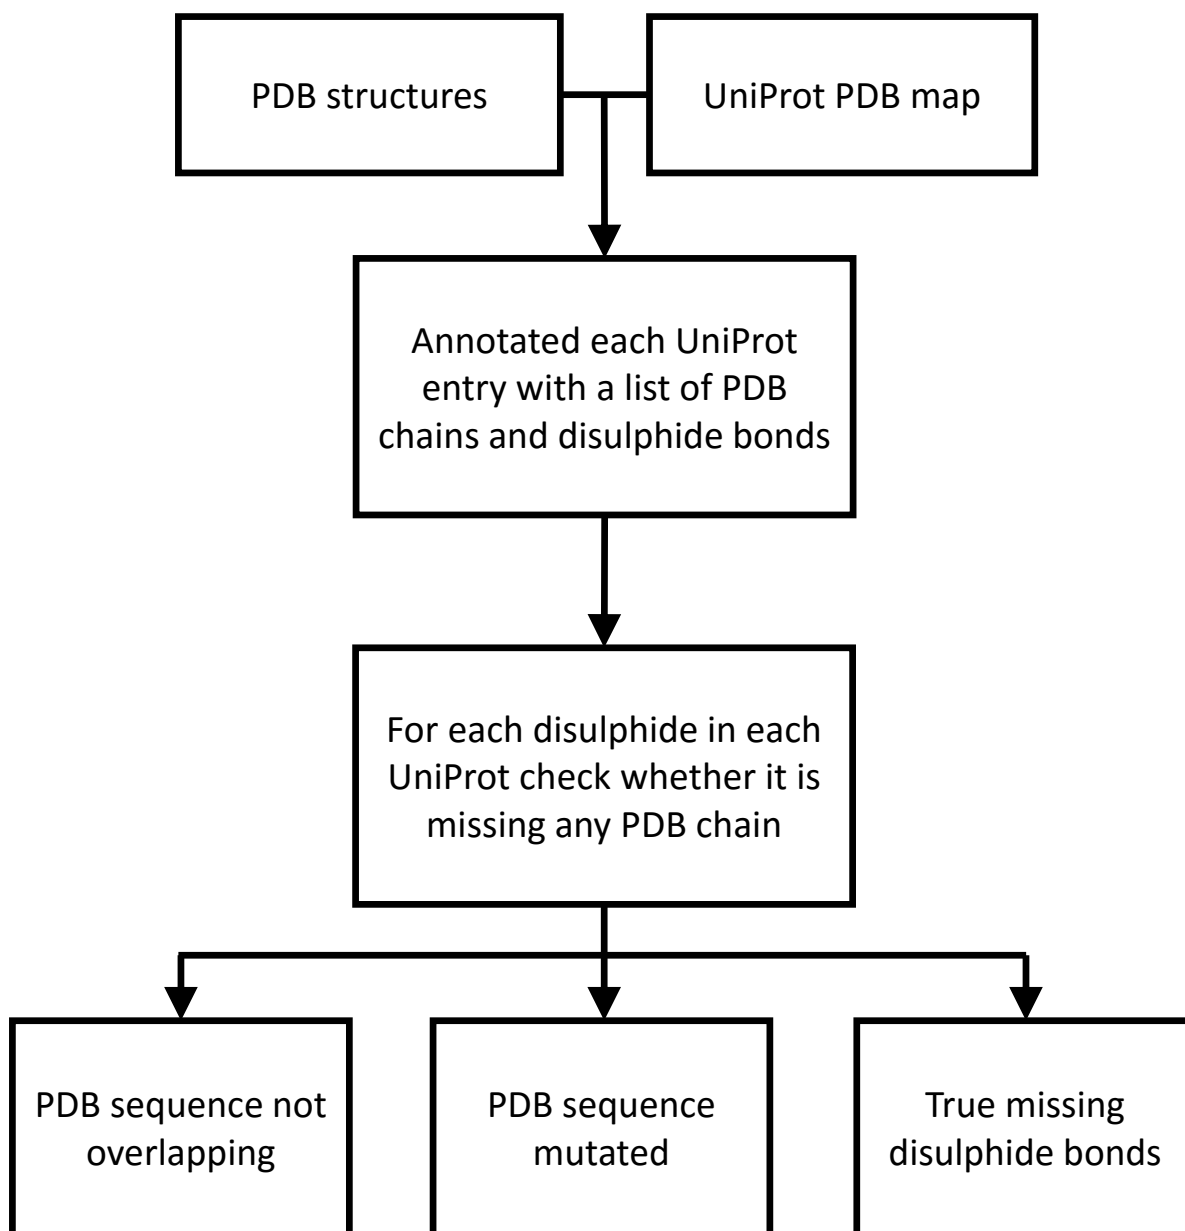

**Figure S1.** Flow chart for mining of PDB X-ray structures for labile disulphide bonds.

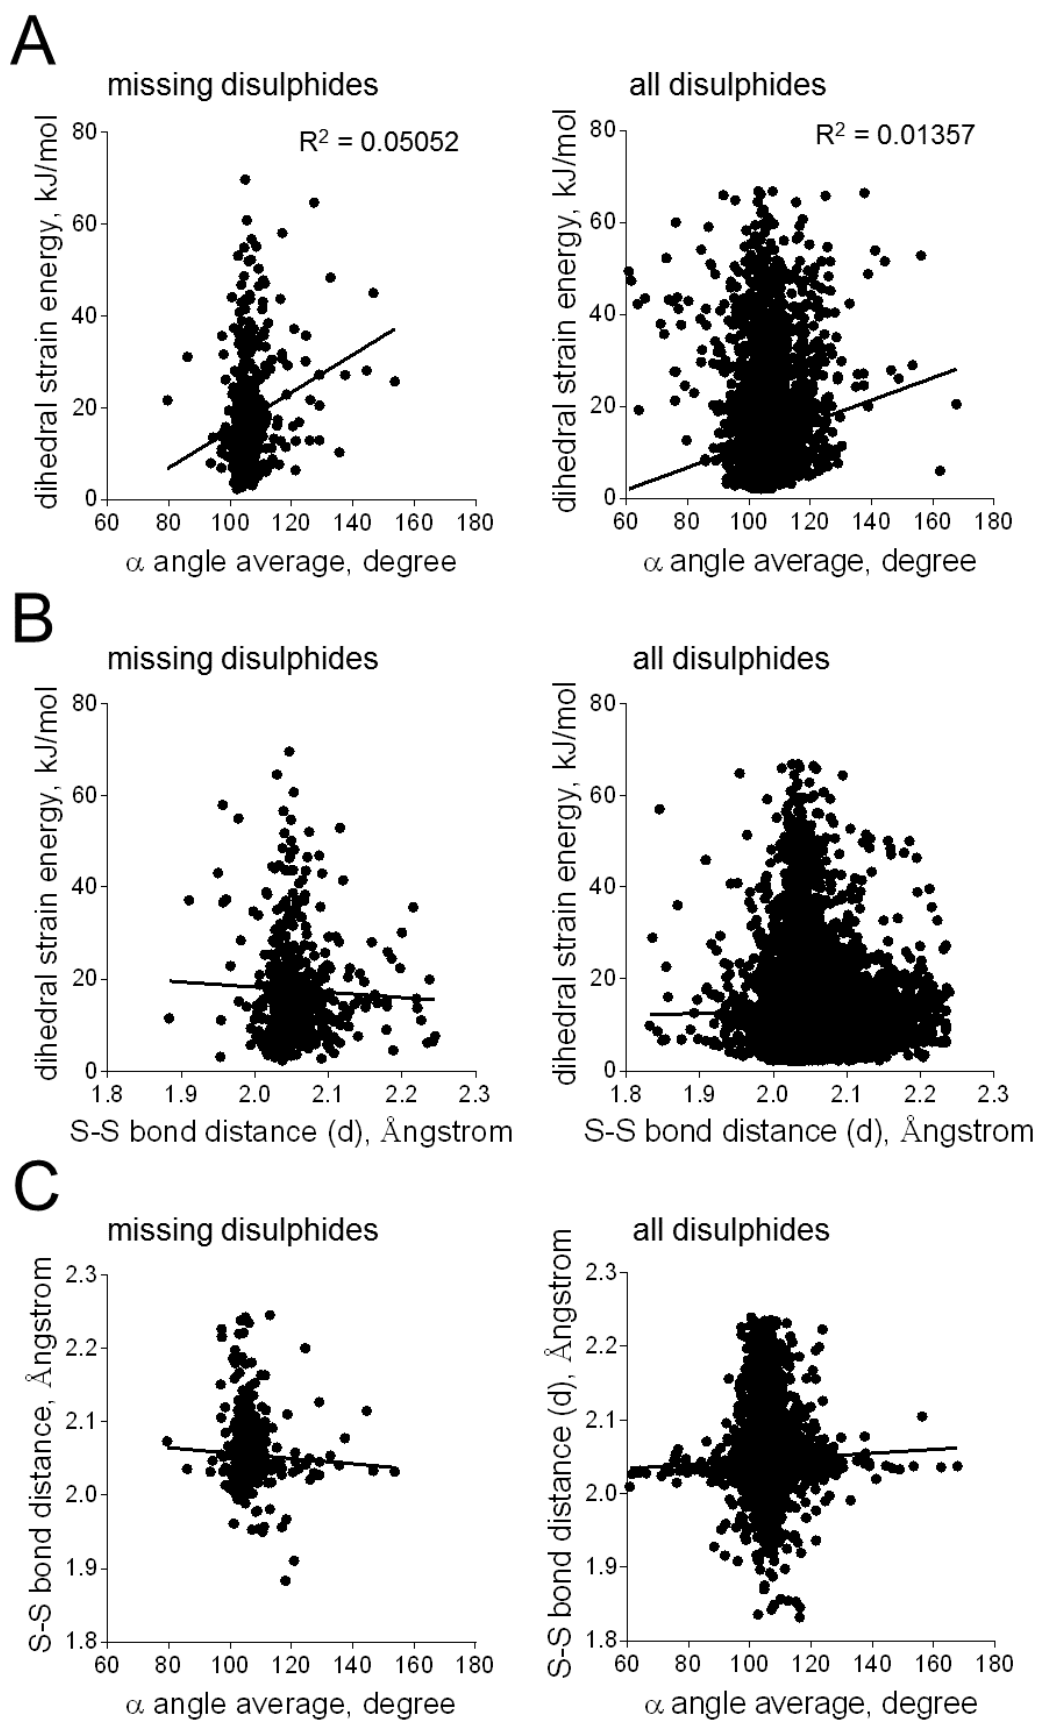

**Figure S2.** Correlations of the measures of strain of the missing and all disulphides. **A.** Positive correlation of DSE with stretching of the  $\alpha$  angle for both missing and all disulphides. **B.** No correlation between DSE and length of the sulphur-sulphur bond of disulphides for both missing and all disulphides. **C.** No correlation between sulphur-sulphur bond length and  $\alpha$  angle for both missing and all disulphides.

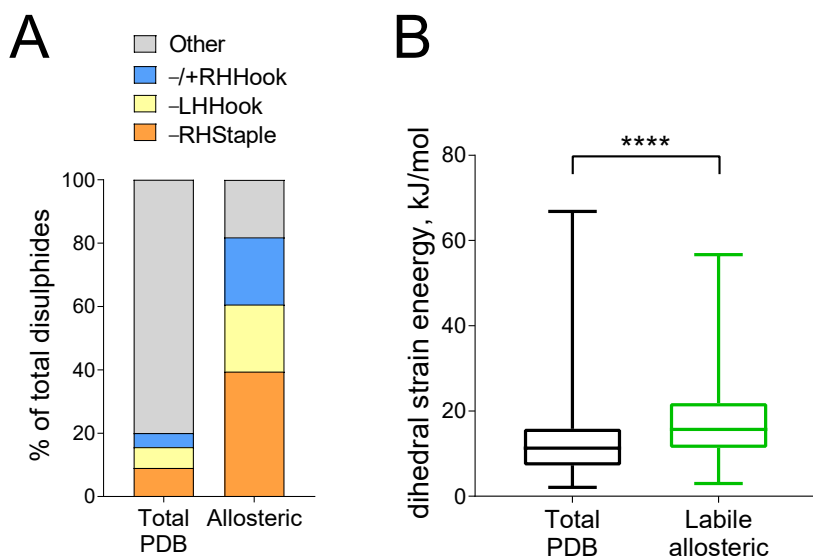

**Figure S3.** The labile disulphides with allosteric configurations have higher dihedral strain energy. **A.** The -RHStaple, -LHHook, and -/+RHHook configurations represent 9%, 6.5%, and 4.5% of all disulphide bonds in the PDB. For the structurally defined allosteric disulphide bonds (n = 29, S2 Table), these percentages increase to 39%, 16%, and 16%, respectively. **B.** The labile disulphide bonds with allosteric configurations (n = 158) have an increased DSE compared to the total PDB ( $p < 0.0001$ , Mann-Whitney test).
